# Supplementary material
Source: publisher figshare collection journal article supplement (https://acs.figshare.com/ndownloader/files/22778927)
Supplement: Supplementary file 1 [file 22778927]

1 **Supplementary Information for:**

2  
3 **Fe<sub>2</sub>O<sub>3</sub>/HY catalyst: A microporous material with zeolite-type**  
4 **framework achieving highly improved alkali**  
5 **poisoning-resistant performance for selective reduction of**  
6 **NO<sub>x</sub> with NH<sub>3</sub>**

7  
8 Yueyao Du, Zhiwei Huang, Jie Zhang, and Guohua Jing\*

9  
10 Department of Environmental Science & Engineering, College of Chemical  
11 Engineering, Huaqiao University, Xiamen, Fujian, China

12  
13  
14  
15  
16  
17 \*Corresponding author:

18 \*E-mail: zhoujing@hqu.edu.cn (G. Jing)

19  
20  
21 **Number of pages: 6**

22 **Number of tables: 1**

23 **Number of figures: 7**

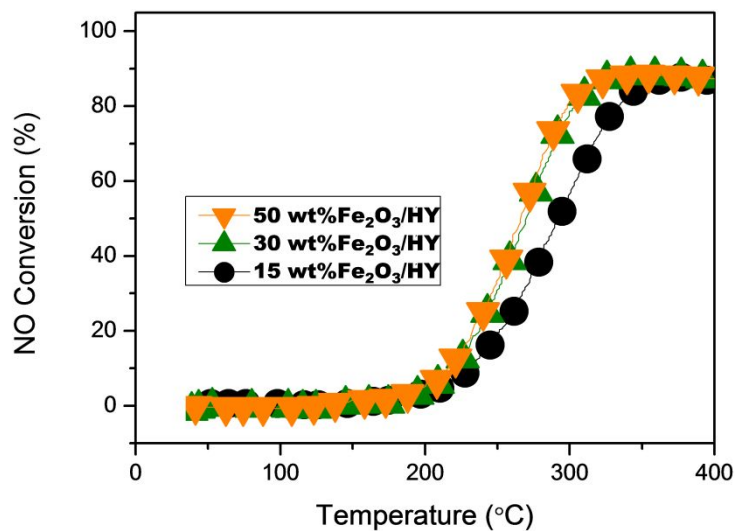

**Figure S1.** NH<sub>3</sub>-SCR performance of Fe<sub>2</sub>O<sub>3</sub>/HY samples prepared at varying Fe<sub>2</sub>O<sub>3</sub> weight loadings.

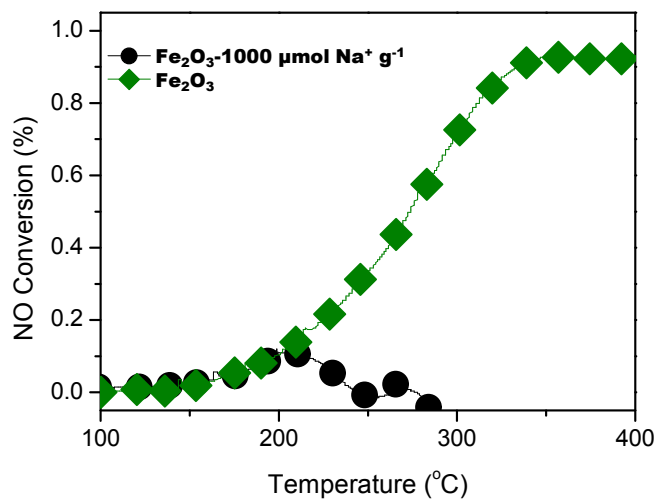

**Figure S2.** NH<sub>3</sub>-SCR performance of Fe<sub>2</sub>O<sub>3</sub> catalyst before and after 1000 μmol Na<sup>+</sup> g<sup>-1</sup> poisoning.

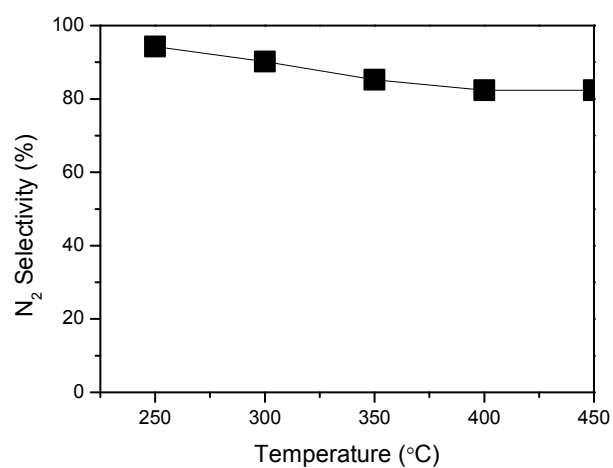

**Figure S3.** The N<sub>2</sub> selectivity over the Fe<sub>2</sub>O<sub>3</sub>/HY catalyst.

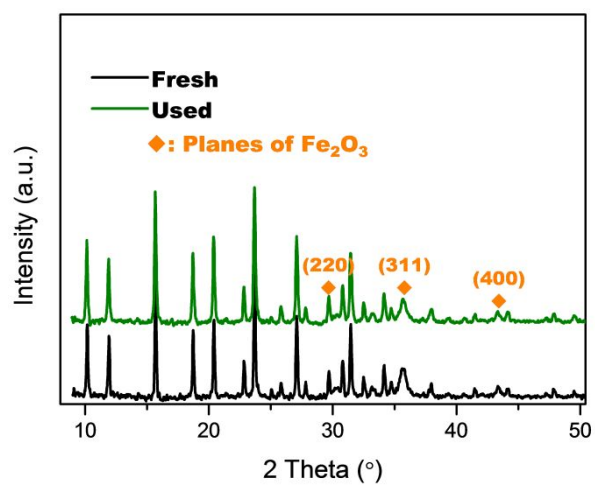

**Figure S4.** XRD patterns of Fe<sub>2</sub>O<sub>3</sub>/HY before and after NH<sub>3</sub>-SCR reaction.

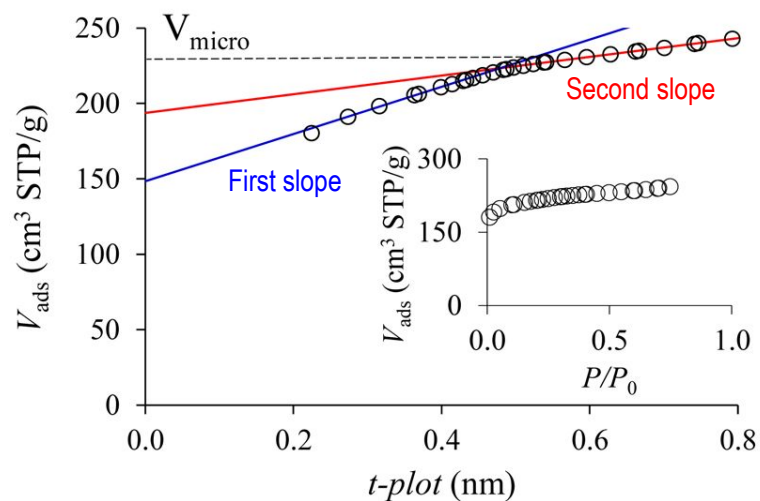

**Figure S5.** t-plot for catalyst. The inset is the raw data of the N<sub>2</sub> adsorption isotherm at K which was used to obtain t-plot. The first and second slopes provide estimation of total surface area and microporesd volume of catalyst, respectively.

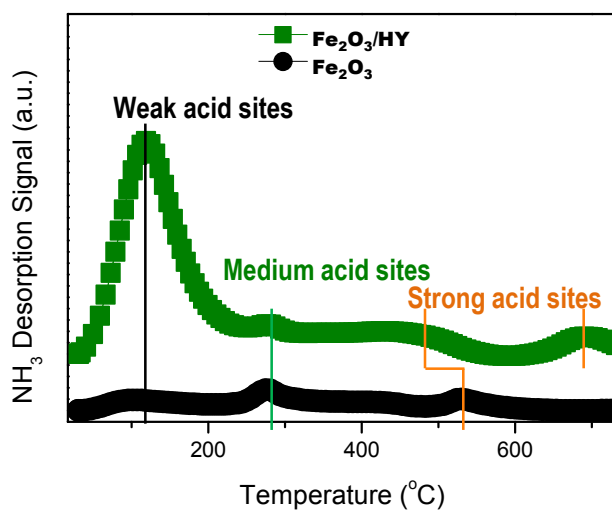

**Figure S6.** NH<sub>3</sub>-TPD profiles of Fe<sub>2</sub>O<sub>3</sub>/HY in comparison with that of the Fe<sub>2</sub>O<sub>3</sub>.

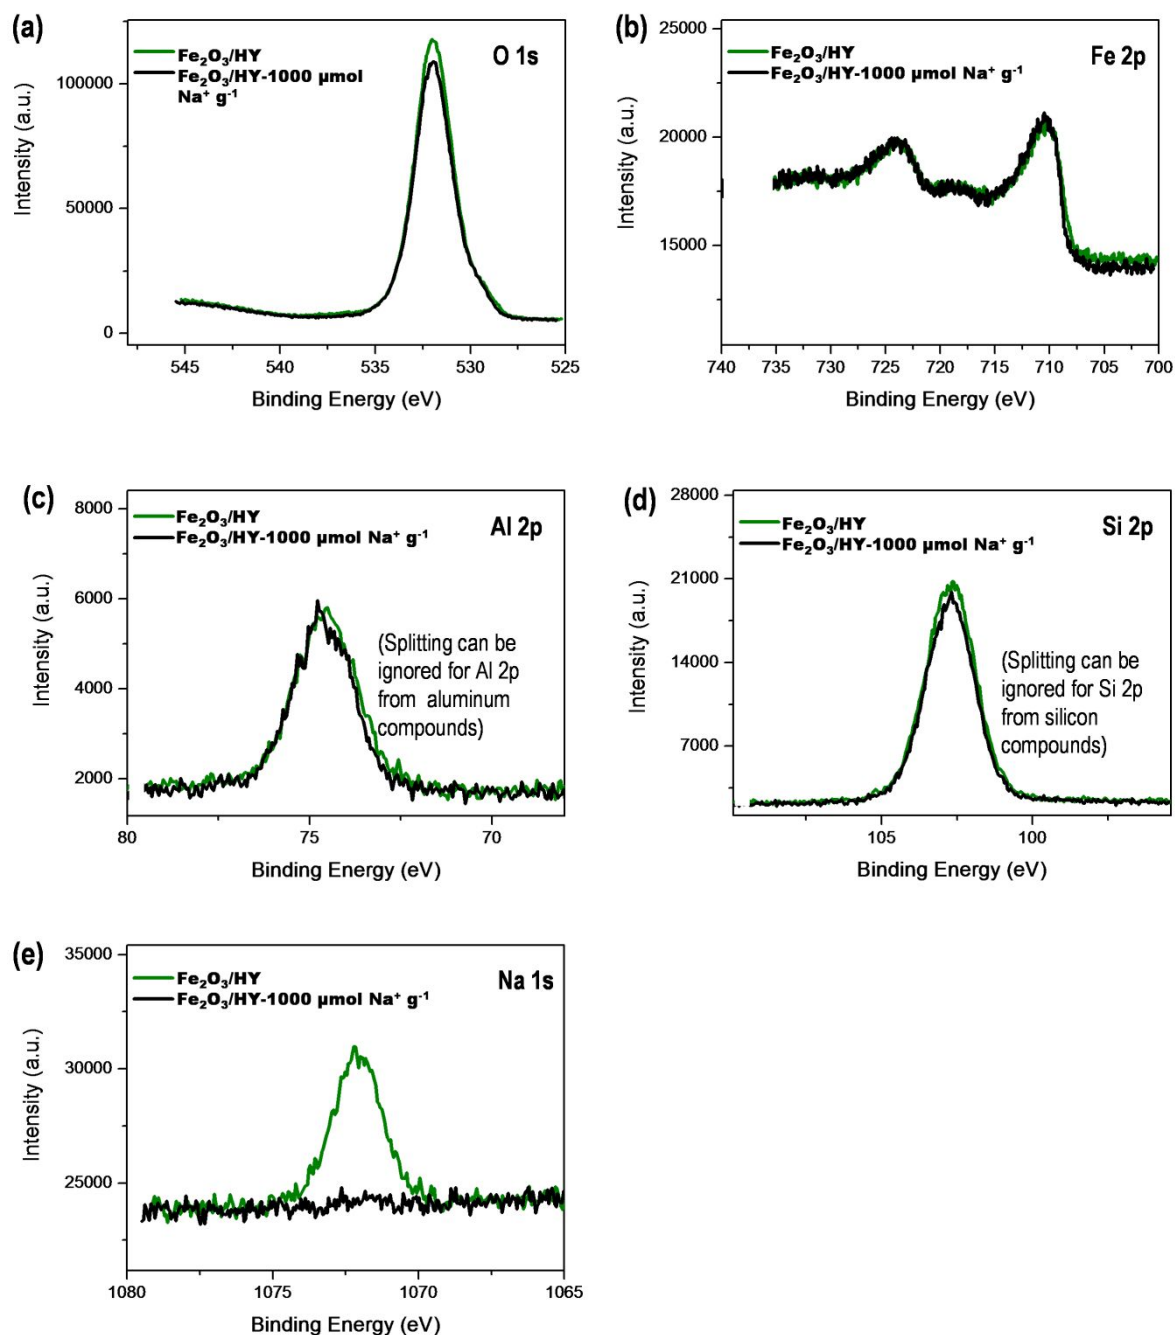

**Figure S7.** O, Fe, Al, Si, and Na XPS spectra for Fe<sub>2</sub>O<sub>3</sub>/HY before and after Na<sup>+</sup> poisoning.

55

56 **Table S1.** The total surface area; Microporous area and external surface area of fresh57 and Na<sup>+</sup> poisoned samples.

| Sample                                                                                                      | Total Surface Area                | Micropore Area                    | External Surface Area             |
|-------------------------------------------------------------------------------------------------------------|-----------------------------------|-----------------------------------|-----------------------------------|
|                                                                                                             | [m <sup>2</sup> g <sup>-1</sup> ] | [m <sup>2</sup> g <sup>-1</sup> ] | [m <sup>2</sup> g <sup>-1</sup> ] |
| Fe <sub>2</sub> O <sub>3</sub> /HY                                                                          | 459                               | 401                               | 58                                |
| Fe <sub>2</sub> O <sub>3</sub> /HY -1000 μmol Na <sup>+</sup> g <sup>-1</sup>                               | 444                               | 381                               | 63                                |
| V <sub>2</sub> O <sub>5</sub> /WO <sub>3</sub> -TiO <sub>2</sub>                                            | 64                                | 5                                 | 59                                |
| V <sub>2</sub> O <sub>5</sub> /WO <sub>3</sub> -TiO <sub>2</sub> -1000 μmol Na <sup>+</sup> g <sup>-1</sup> | 44                                | 7                                 | 37                                |

58
